# Supplementary material for: Examining the electron transport in chalcogenide perovskite BaZrS3
Source: Royal Society of Chemistry journal article supplement (doi:10.1039/d1tc00374g), 2021-01-01
Supplement: d1tc00374g1.pdf [file d1tc00374g1.pdf]

Supplementary Information

## Electron transport in chalcogenide perovskite BaZrS<sub>3</sub>

Eric Osei-Agyemang<sup>1</sup>, Nikhil Koratkar,<sup>2</sup> and Ganesh Balasubramanian<sup>1,\*</sup>

<sup>1</sup> Department of Mechanical Engineering and Mechanics, Lehigh University, 19 Memorial Drive  
West, Bethlehem, PA 18015, USA

<sup>2</sup> Department of Mechanical, Aerospace and Nuclear Engineering and Department of Materials  
Science and Engineering, Rensselaer Polytechnic Institute, Troy, NY 12180, USA

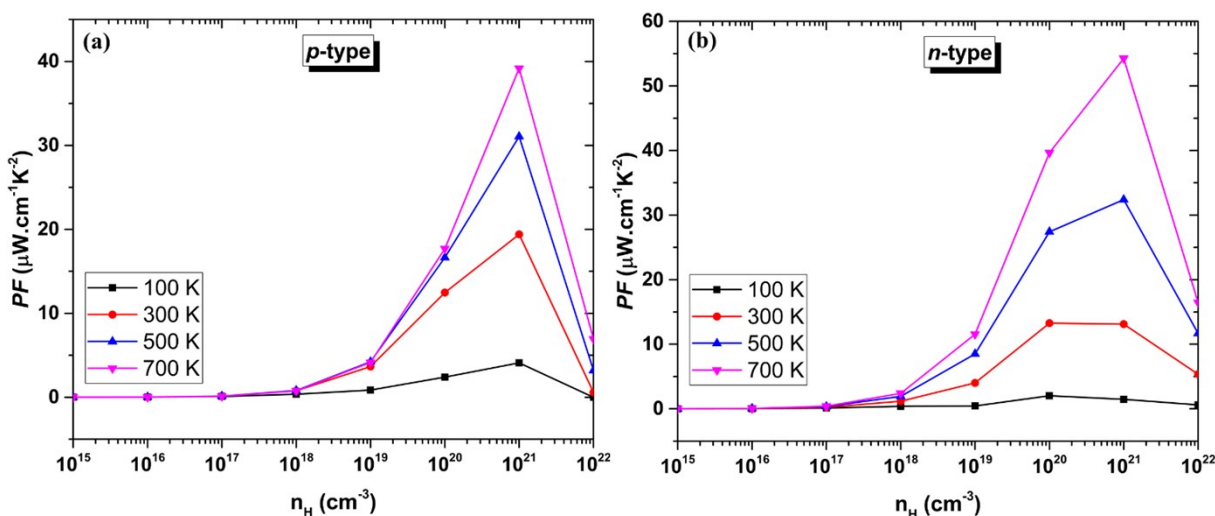

**Figure S1.** Power factor ( $PF$ ) of BaZrS<sub>3</sub> against carrier concentration  $n_H$  at different temperatures. Here, we note that the highest  $PF$  values are achieved at  $10^{21}$   $\text{cm}^{-3}$ .

---

\* Corresponding author. Email: [bganesh@lehigh.edu](mailto:bganesh@lehigh.edu). Phone: +1 610 758 3784;  
Address: Packard Laboratory 561, 19 Memorial Drive West, Bethlehem, PA 18015, USA.

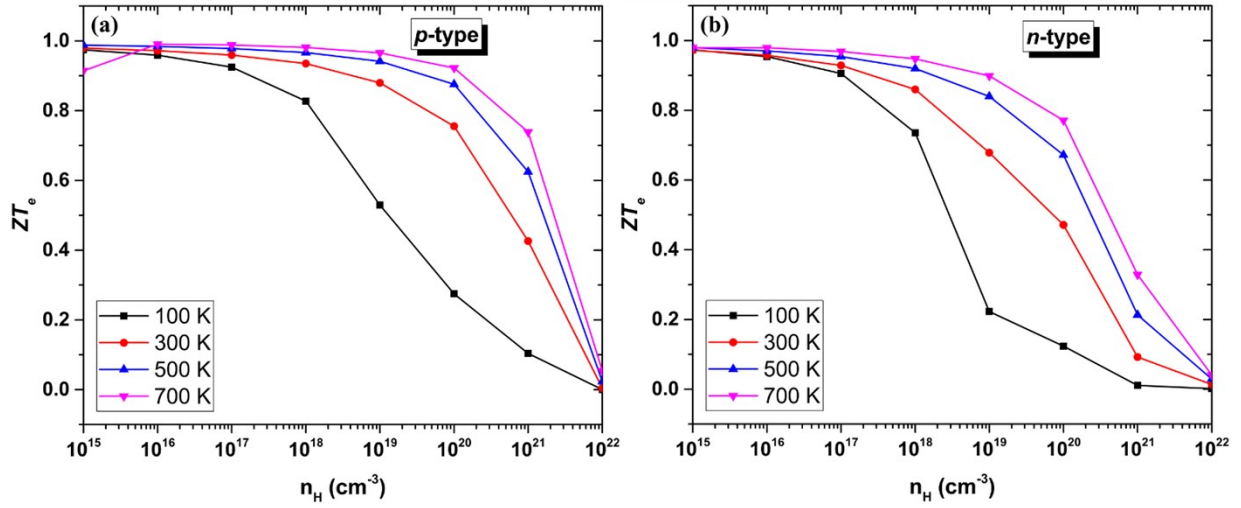

**Figure S2.** Upper limit of the thermoelectric figure of merit ( $ZT_e$ ) against carrier concentration at different temperatures for BaZrS<sub>3</sub>. The highest  $ZT_e$  values are achieved at  $10^{15}$  cm<sup>-3</sup> to  $10^{18}$  cm<sup>-3</sup> for *p*- and *n*-type doping at  $T > 100$  K.

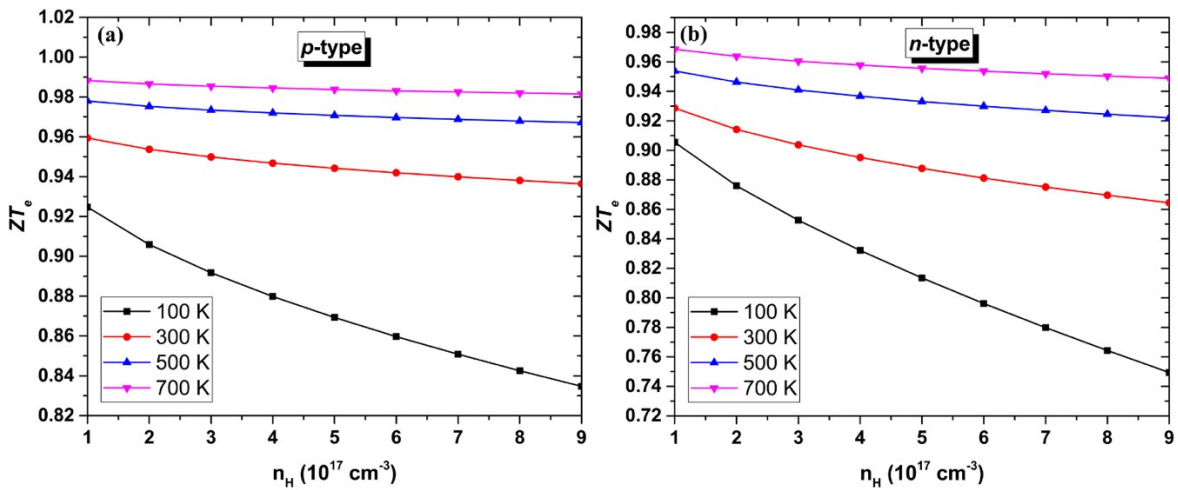

**Figure S3.** The variation of  $ZT_e$  with temperature at different carrier concentrations of  $1 \times 10^{17}$  cm<sup>-3</sup> to  $9 \times 10^{17}$  cm<sup>-3</sup> for BaZrS<sub>3</sub>. The highest  $ZT_e$  values are obtained at a carrier concentration of  $1 \times 10^{17}$  cm<sup>-3</sup> at all temperatures.

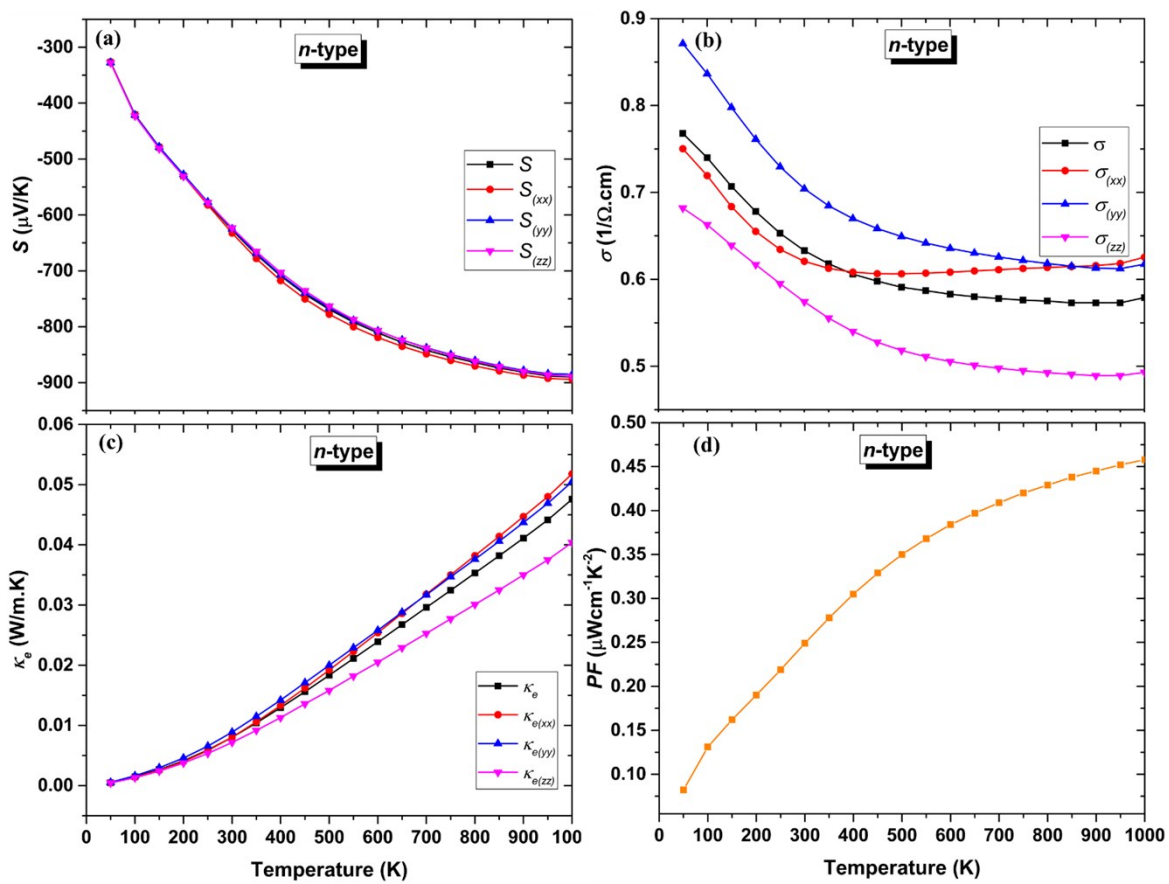

**Figure S4.** Transport properties against temperature for *n*-type doping at carrier concentrations of  $10^{17} \text{ cm}^{-3}$  for  $\text{BaZrS}_3$ . Anisotropic effects are observed for  $S$ ,  $\sigma$  and  $\kappa_e$ .
